# Supplementary material for: Long-Term Consequences of Asymptomatic SARS-CoV-2 Infection: A Systematic Review and Meta-Analysis
Source: MDPI journal article supplement (doi:10.3390/ijerph20021613), 2023-01-16
Supplement: s1 [file supplementary-Table S1.xlsx]

## Sheet: Supplementary table S1
Supplementary table S1. Characteristics of the included studies
Record number	First author	Article type	Study design	Publication time	Country	City	Object of study	Follow-up time	Time range of the studiy	Time criteria for inclusion of study objects	Time range for inclusion of study objects	Epidemic strain	Sample size (N)	Symptomatic SARS-CoV-2 infection (n1)	Asymptomatic SARS-CoV-2 infection (n2)	Sex (F/M)	Median / Mean age	BMI	≥1 comorbidity (N)	Type of comorbidity	Smoking status	Risk of bias
1	Trapani, G. [22]	Published article	cohort study	2022.06	Italy	Liguria, Piedmont, Lombardy, Emilia-Romagna, Lazio, Puglia, Calabria and Sardinia	Children	2-9 months	2021.06-2021.08	Confirmed time	2020.10-2021.06	20I (Alpha, V1), 20A, 20E(EU1)	629	230	399	313/316	-	-	59/629	-	-	Low
2	Knoke, L. [23]	Published article	prospective cohort study	2022.04	Germany	Bochum	Children	6 months	2020.08-2021.03	Confirmed time	2020.08-2021.03	20I (Alpha, V1), 20A, 20B, 20D, 20E (EU1)	73	27	46	38/35	10.8 ±3.3	-	-	17 (23.3%) previous or current pulmonary disease	-	Low
3	Appelt, Pablo Andrei [24]	Published article	prospective cohort study	2022.05	Brazil	-	Adults	6-12 months	2020.09-2021.09	-	-		53	-	53	37/16	42.3 (25 - 69)	27.8	-	16 (37.2%) cardiovascular disease, 12 (22.6%) lung disease, 15 (28.3%) type 2 diabetes, 4 (7.5%) hematological disease, 2 (3.7%) hepatic disease, 1 (1.9%) renal disease.	-	Low
4	Fischer, Aurelie [25]	Published article	prospective cohort study	2022.08	Luxembourg	-	Adults	12 months	2020.05.01-2020.11.08	Confirmed time	2020.05.01-2020.11.08	20A, 20B, 20E(EU1)	289	245 (174 mild, and 58 moderate/severe SARS-CoV-2 infection. Information on disease severity of the remaining 13 patients was missing.)	44	144/145	40.2 ± 12.5	25.6	-	8 (2.9%) diabetes, 8 (2.9%) asthma, 9 (3.3%) cardiovascular disease, 26 (9.4%) hypertension, 155 (54.2%) poor sleep.	55 (19.9%) former smokers, 48 (17.4%) current smokers.	Low
5	Peghin, M. [14]	Published article	bidirectional cohort study	2021.10	Italy	Udine	Adults	6 months	2020.03-2020.11	Confirmed time	2020.03.01-2020.05.30	20A, 20B	599	544 (409 mild, 93 moderate, 24 severe, and 15 critical SARS-CoV-2 infection, 2 unclear.)	55	320/599	53±15.8 (18‒94)	-	314/599	135 (22.5%) hypertension, 98 (16.4%) obesity, 33 (5.5%) diabetes, 21 (3.5%) chronic respiratory disease, 7 (1.2%) cardiovascular disease, 10 (1.7%) liver disease, 6 (1.0%) psychiatric disorders, 0 (0.0%) renal impairment	126/597 (21.1%) former-smokers, 82/597 (13.7%) current-smokers.	Low

## Sheet: NOS 
NEWCASTLE - OTTAWA QUALITY ASSESSMENT SCALE
Record number	Selection				Comparability	Outcome			Number of stars	Risk of bias
	Representativeness of the exposed cohort	Selection of the non exposed cohort	Ascertainment of exposure	Demonstration that outcome of interest was not present at start of study	Comparability of cohorts on the basis of the design or analysis	Assessment of outcome	Was follow-up long enough for outcomes to occur	Adequacy of follow up of cohorts
1	1	1	1	1	0	1	1	1	7	Low
2	1	1	1	1	2	1	1	1	9	Low
3	1	1	1	1	2	1	1	1	9	Low
4	1	1	1	1	1	1	1	1	8	Low
5	1	1	1	1	2	1	1	1	9	Low
