# Supplementary material for: Long-Term Consequences of Asymptomatic SARS-CoV-2 Infection: A Systematic Review and Meta-Analysis
Source: MDPI journal article supplement (doi:10.3390/ijerph20021613), 2023-01-16
Supplement: s1 [file supplementary-Table S2.pdf › supplementary-Table S2.pdf]

**Supplementary table S2. Subgroup analysis for long-term consequences of asymptomatic and symptomatic SARS-CoV-2 infection based on the object of study**

| Consequences                | Asymptomatic<br>infection<br>n/N | Symptomatic<br>infection<br>n/N | OR   | 95%CI     | P-value | I <sup>2</sup> (%) | P-Heterogeneity |
|-----------------------------|----------------------------------|---------------------------------|------|-----------|---------|--------------------|-----------------|
| <b>At least one symptom</b> |                                  |                                 |      |           |         |                    |                 |
| Children                    | 56/444                           | 116/255                         | 0.25 | 0.08-0.81 | <0.05   | 76.90              | <0.05           |
| Adults                      | 20/99                            | 460/786                         | 0.13 | 0.02-1.21 | >0.05   | 90.60              | <0.05           |
| Overall                     | 76/543                           | 576/1041                        | 0.20 | 0.09-0.45 | <0.05   | 79.40              | <0.05           |
| <b>Fatigue</b>              |                                  |                                 |      |           |         |                    |                 |
| Children                    | 11/444                           | 43/255                          | 0.18 | 0.03-1.15 | >0.05   | 80.90              | <0.05           |
| Adults                      | 8/99                             | 169/786                         | 0.27 | 0.12-0.59 | <0.05   | 0.00               | >0.05           |
| Overall                     | 19/543                           | 212/1041                        | 0.19 | 0.08-0.49 | <0.05   | 61.30              | >0.05           |
| <b>Cutaneous lesions</b>    |                                  |                                 |      |           |         |                    |                 |
| Children                    | 3/399                            | 9/230                           | 0.19 | 0.05-0.69 | <0.05   | -                  | -               |
| Adults                      | 1/99                             | 27/786                          | 0.43 | 0.08-2.27 | >0.05   | 0.00               | >0.05           |
| Overall                     | 4/498                            | 36/1016                         | 0.26 | 0.09-0.72 | <0.05   | 0.00               | >0.05           |
| <b>Dyspnoea</b>             |                                  |                                 |      |           |         |                    |                 |
| Children                    | 2/45                             | 4/25                            | 0.24 | 0.04-1.44 | >0.05   | -                  | -               |
| Adults                      | 3/99                             | 85/786                          | 0.26 | 0.08-0.78 | <0.05   | 0.00               | >0.05           |
| Overall                     | 5/144                            | 89/811                          | 0.25 | 0.10-0.65 | <0.05   | 0.00               | >0.05           |
| <b>Loss of taste/smell</b>  |                                  |                                 |      |           |         |                    |                 |
| Children                    | 4/444                            | 24/255                          | 0.11 | 0.01-1.44 | >0.05   | 75.70              | <0.05           |
| Adults                      | 0/55                             | 62/541                          | 0.07 | 0.00-1.13 | >0.05   | -                  | -               |
| Overall                     | 4/499                            | 86/796                          | 0.10 | 0.02-0.58 | <0.05   | 53.50              | >0.05           |
